# Supplementary material for: Choline Dehydrogenase Polymorphism rs12676 Is a Functional Variation and Is Associated with Changes in Human Sperm Cell Function
Source: PLoS One. 2012 Apr 27;7(4):e36047. doi: 10.1371/journal.pone.0036047 (PMC3338626; doi:10.1371/journal.pone.0036047)
Supplement: Figure S1 — Health questionnaire form. All subjects completed the health questionnaire form during the screen visit. (PDF) [file pone.0036047.s001.pdf]

**Choline dehydrogenase and sperm motility in men**

## Medical History Questionnaire

Name \_\_\_\_\_ Date \_\_\_\_\_

Date of birth \_\_\_\_\_ Marital Status \_\_\_\_\_ Number of children \_\_\_\_\_

Were any of your children conceived using assisted reproductive technology due to male factor infertility? Yes / No

Have you ever been diagnosed with a fertility problem? Yes / No

If "yes" please circle all that apply:

Low sperm count      Low sperm motility      Increased semen viscosity

Decreased semen viscosity      Abnormal sperm shape      Increased semen volume

Decreased semen volume      Abnormal semen pH      Abnormal liquefaction time

Abnormal number of white blood cells in semen

Other, please explain \_\_\_\_\_

\_\_\_\_\_

Were you ever treated for a fertility problem? Yes / No

If "yes", please describe treatment: \_\_\_\_\_

\_\_\_\_\_

Was your condition improved with treatment? Yes / No

Do you have male family members with fertility problems? Yes / No

If "yes", what is their relationship to you (brother, father, etc)? \_\_\_\_\_

Are you currently taking any medication? If "yes", please specify. \_\_\_\_\_

\_\_\_\_\_

Are you taking any medication known to alter fertility or sperm function? Yes / No

Please specify. \_\_\_\_\_

Are you currently being treated for a medical condition? Yes / No

If "yes", please specify. \_\_\_\_\_

\_\_\_\_\_

Do you have a chronic medical condition? Yes / No

If "yes", please specify \_\_\_\_\_
